# Supplementary material for: Dipolar interaction-mediated molecular anchoring electrolyte enables wide-temperature sodium-ion batteries with enhanced safety and durability
Source: Research Square preprint supplement (doi:10.21203/rs.3.rs-6768086/v1), 2025-06-06
Supplement: Supplementary file 1 [file 7b615f52b4c49e525bdae15a.docx]

Supporting Information

**Dipolar interaction-mediated molecular anchoring electrolyte enables wide-temperature sodium-ion batteries with enhanced safety and durability**

Yong-Li Heng1, Zhen-Yi Gu1*, Han-Hao Liu2, Xiao-Tong Wang1, Jie Wang2, Shu-Yu Li2, Xing-Long Wu1*

1 Y.-L. Heng, Z.-Y. Gu, X.-T. Wang, X.-L. Wu

State Key Laboratory of Integrated Optoelectronics, and MOE Key Laboratory for UV Light-Emitting Materials and Technology, Department of Physics, Northeast Normal University, Changchun, Jilin 130024, P. R. China

E-mail: xinglong@nenu.edu.cn

2 H.-H. Liu, J. Wang, S.-Y. Li

Department of Chemistry, Northeast Normal University, Changchun, Jilin 130024, P. R. China


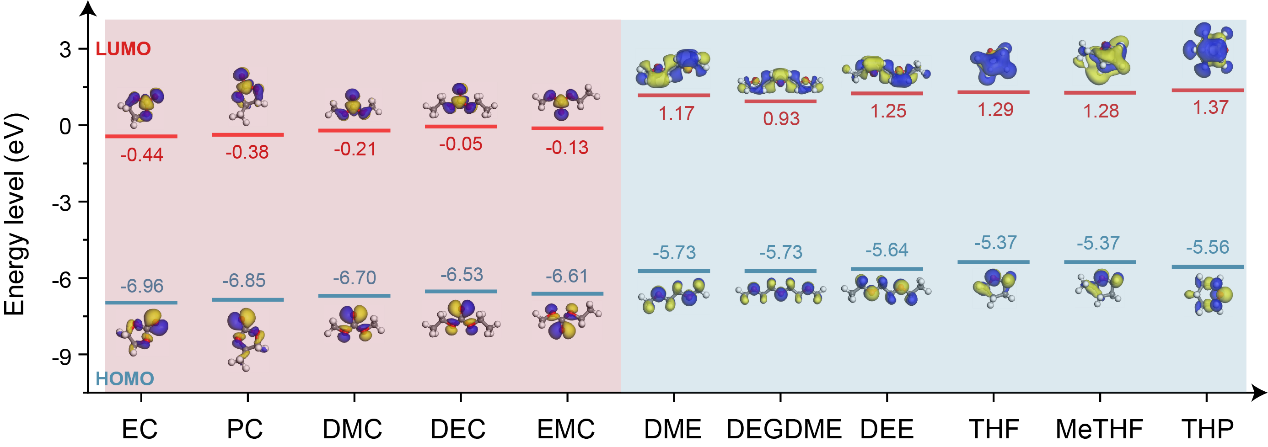


**Supplementary Figure 1.** The calculated HOMO/LUMO energy levels of a series of carbonate ester and ether based solvents.


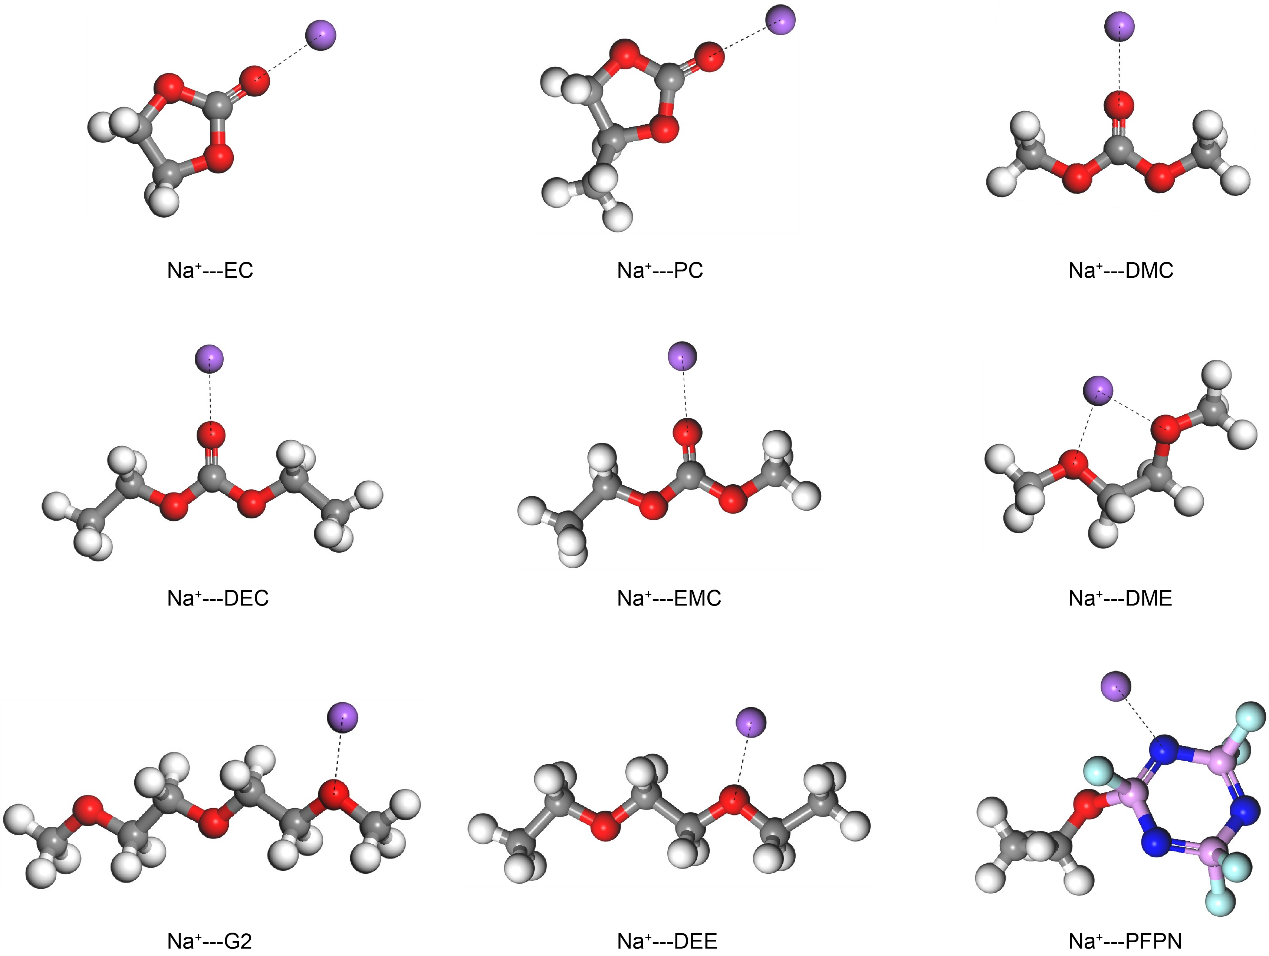


**Supplementary Figure 2.** The binding energy calculations with optimized structures for various Na+-solvent complexes.


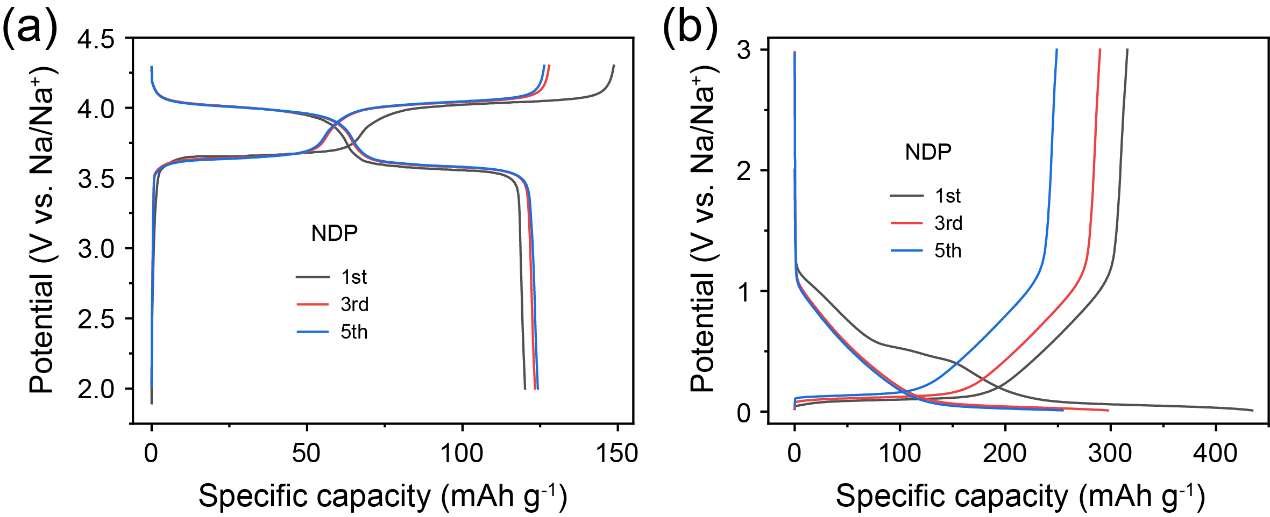


**Supplementary Figure 3.** Initial GCD curves of the sodium-ion half cells with (a) NVPOF cathode at 0.1 C and (b) HC anode at 25 mA g-1 in the NDP electrolyte.


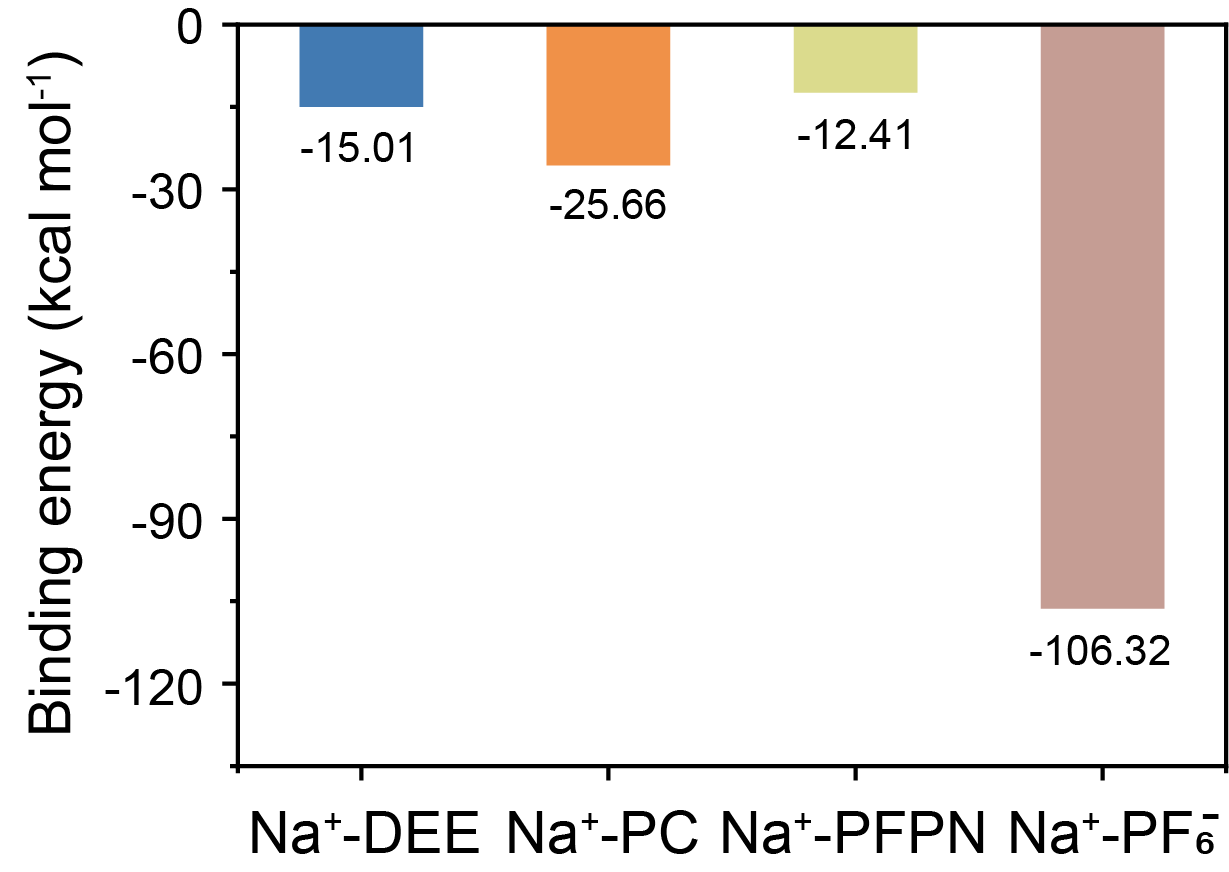


**Supplementary Figure 4.** Binding energies between various species and Na+.


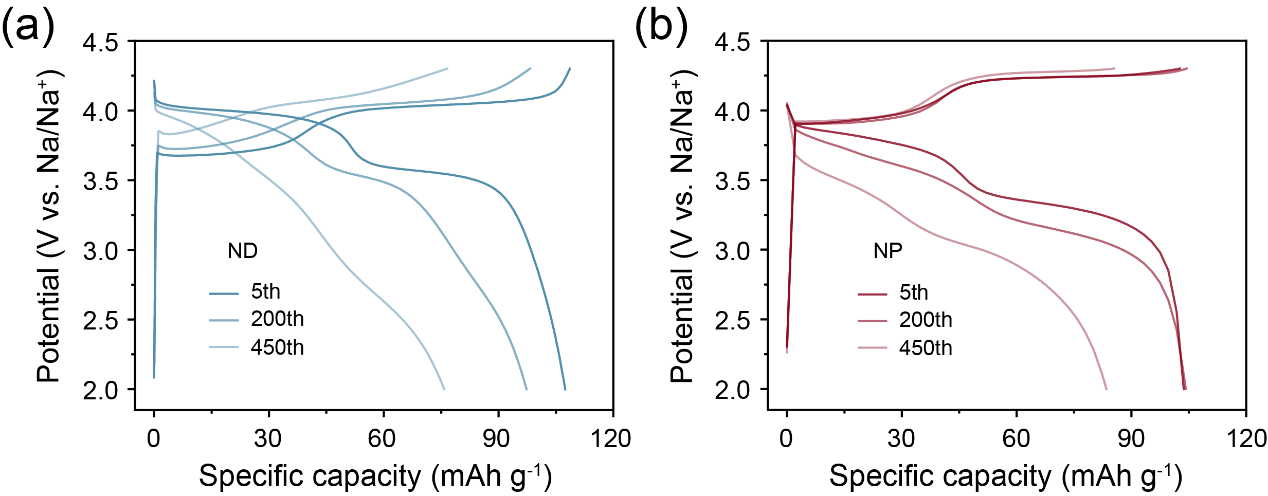


**Supplementary Figure 5.** Charge/discharge curves of the NVPOF cathode after different cycles in (a) ND and (b) NP electrolytes, respectively.


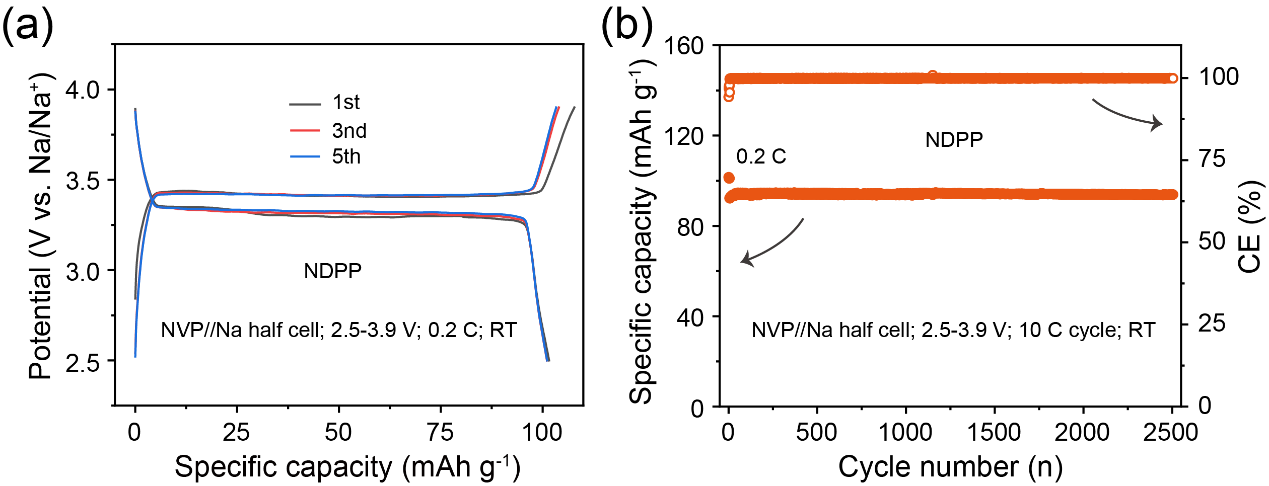


**Supplementary Figure 6.** Electrochemical properties of the NVP cathode in NDPP electrolyte at RT. (a) Typical GCD curves. (b) Cycling stability.


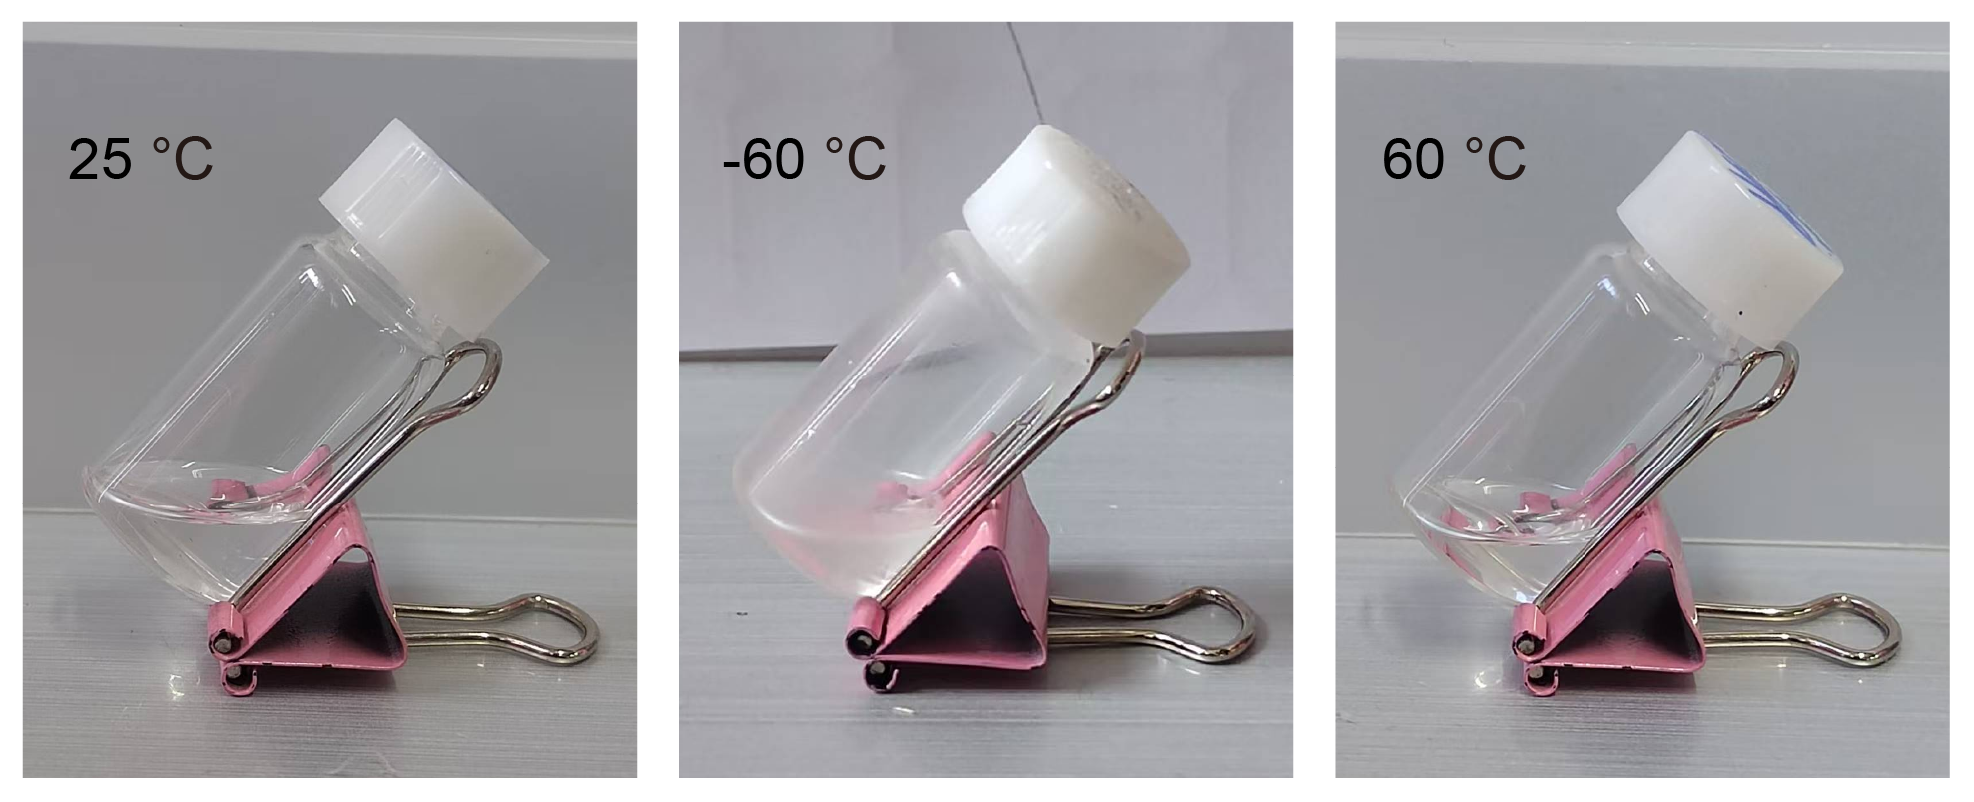


**Supplementary Figure 7.** Optical photographs of the formulated NDPP electrolyte after storage at 25, -60 and 60 ℃.


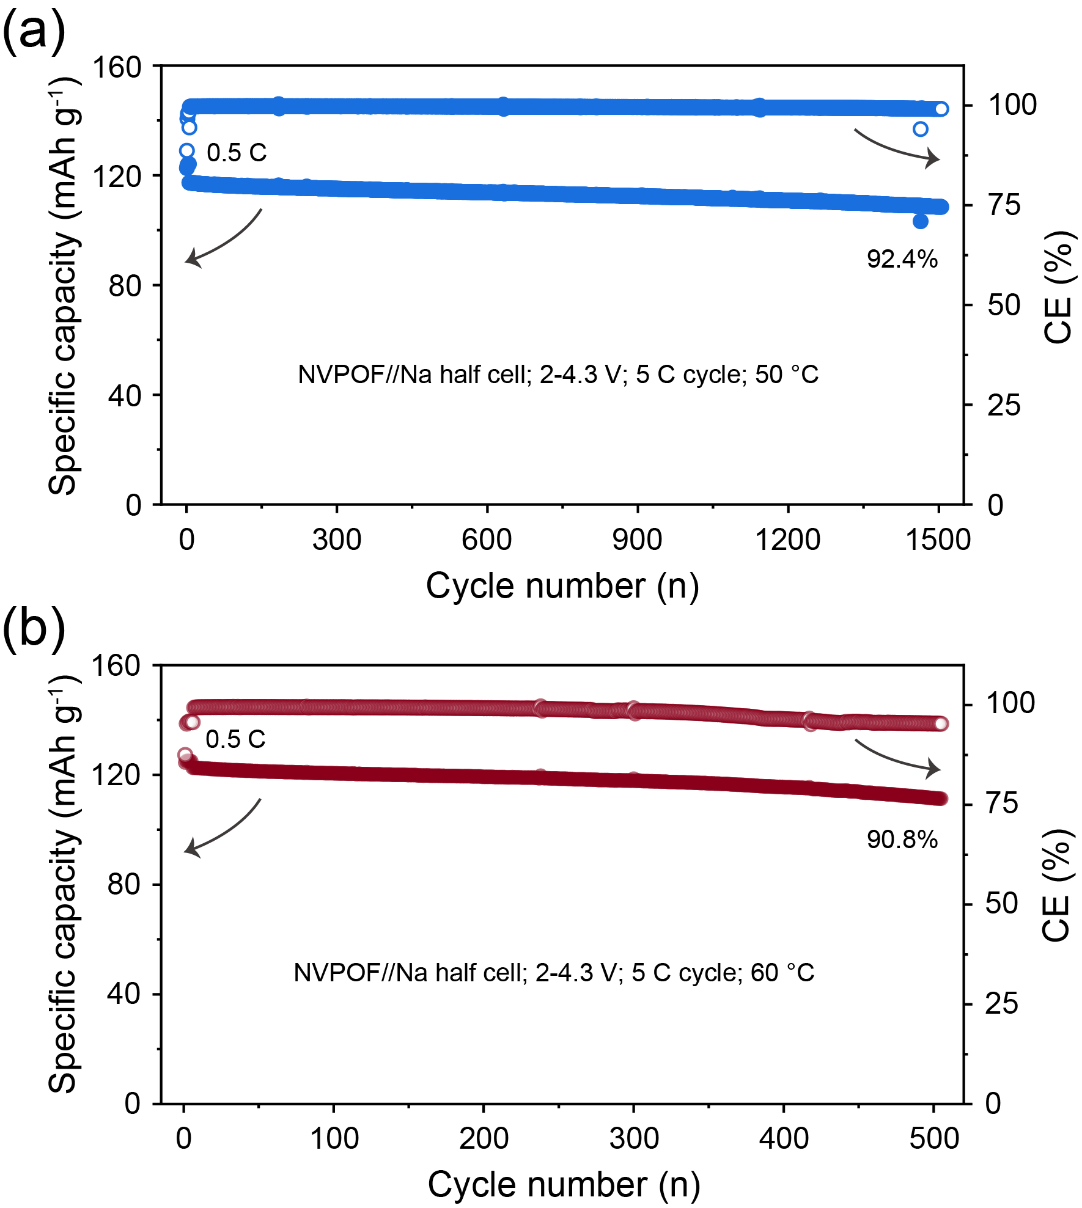


**Supplementary Figure 8.** Cycling stability of the NVPOF cathode in NDPP electrolyte at high temperatures. (a) 50 ℃. (b) 60 ℃.


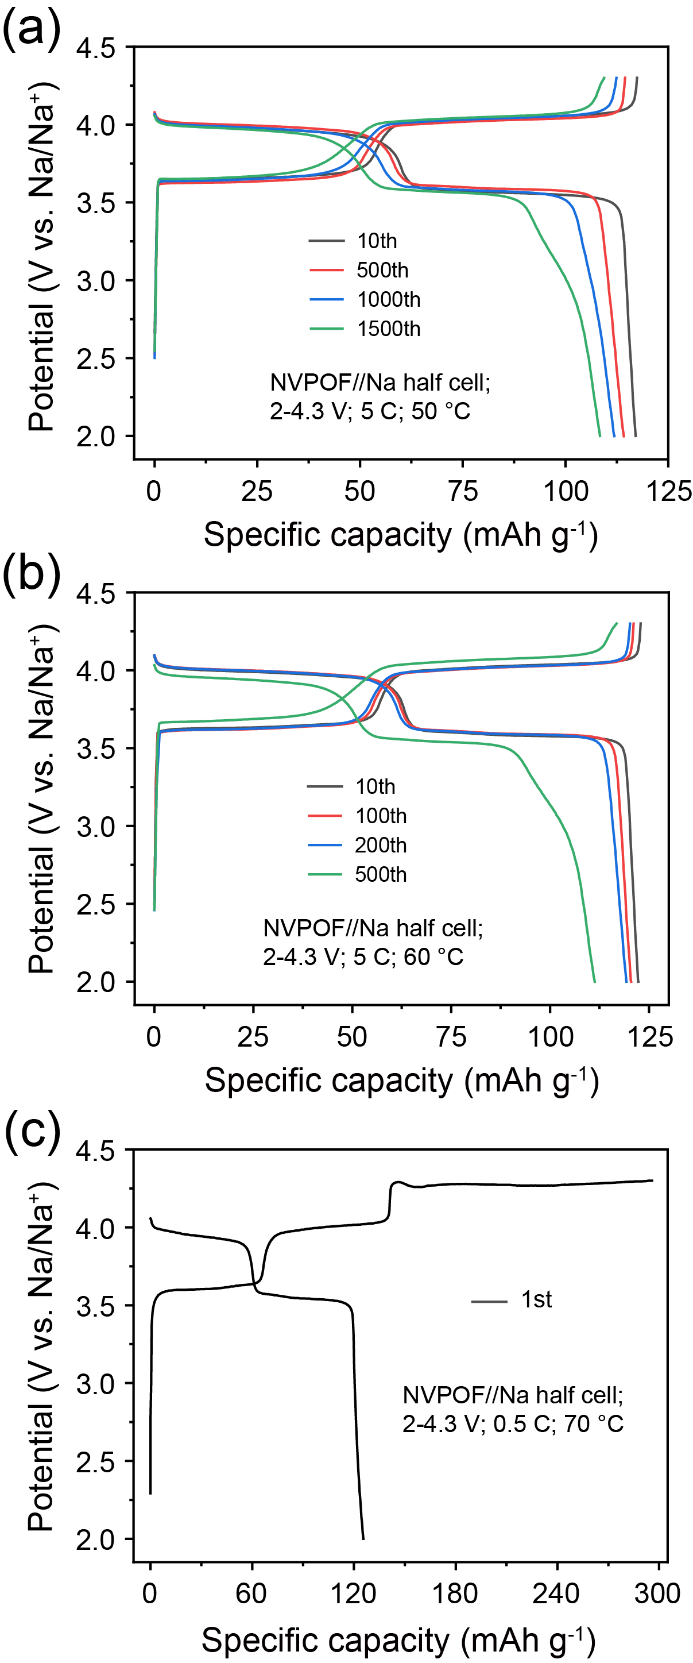


**Supplementary Figure 9.** GCD curves of the NVPOF cathode in NDPP electrolyte at high temperatures. (a) 50 ℃. (b) 60 ℃. (c) 70 ℃.


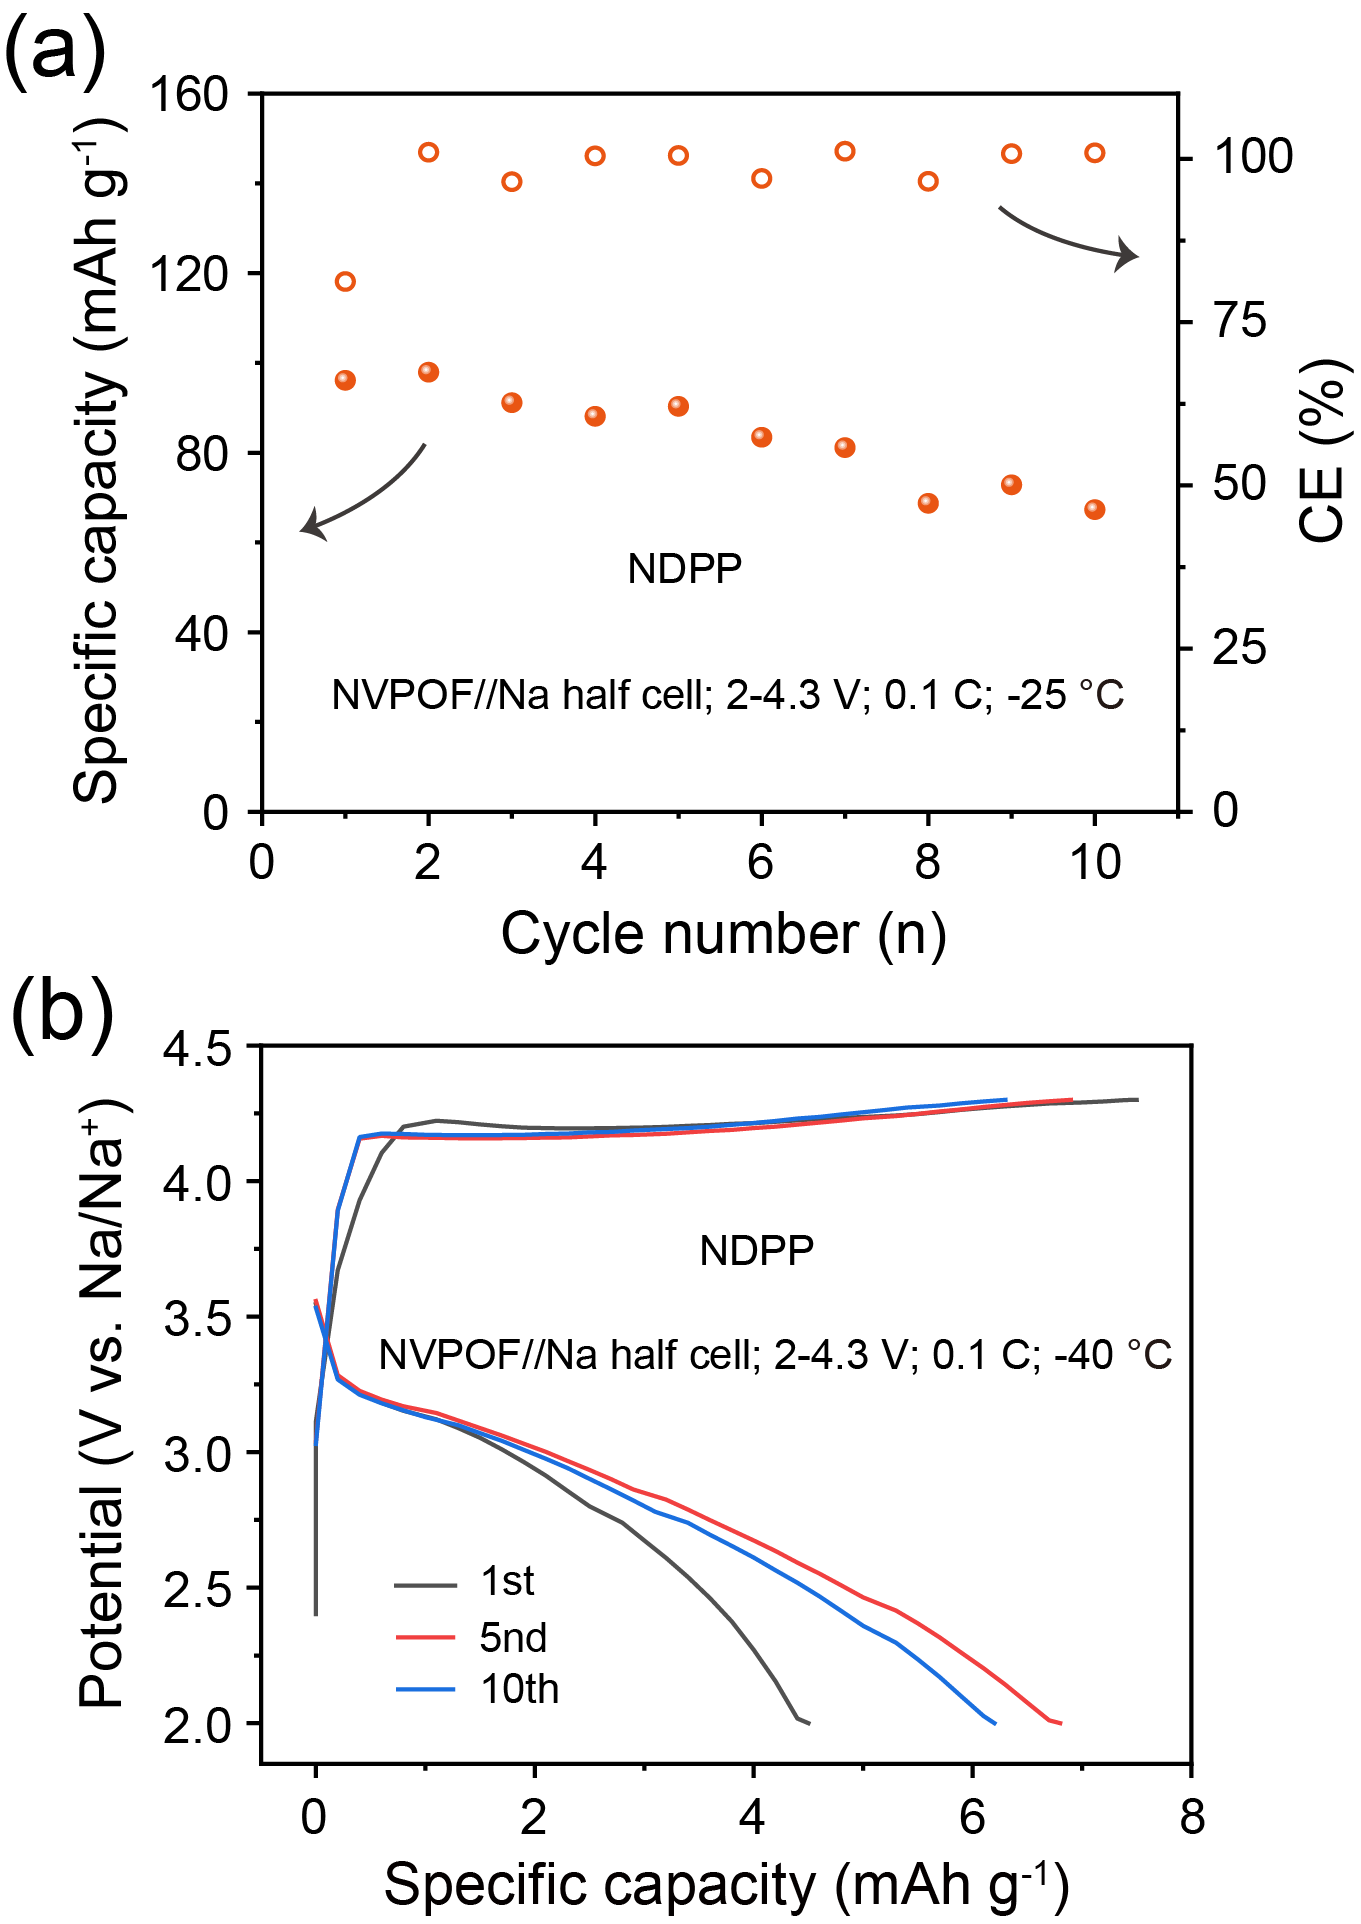


**Supplementary Figure 10.** Electrochemical properties of the NVPOF cathode in NDPP electrolyte at low temperatures. (a) Cycling stability at -25 ℃. (b) Typical GCD curves at -40 ℃.


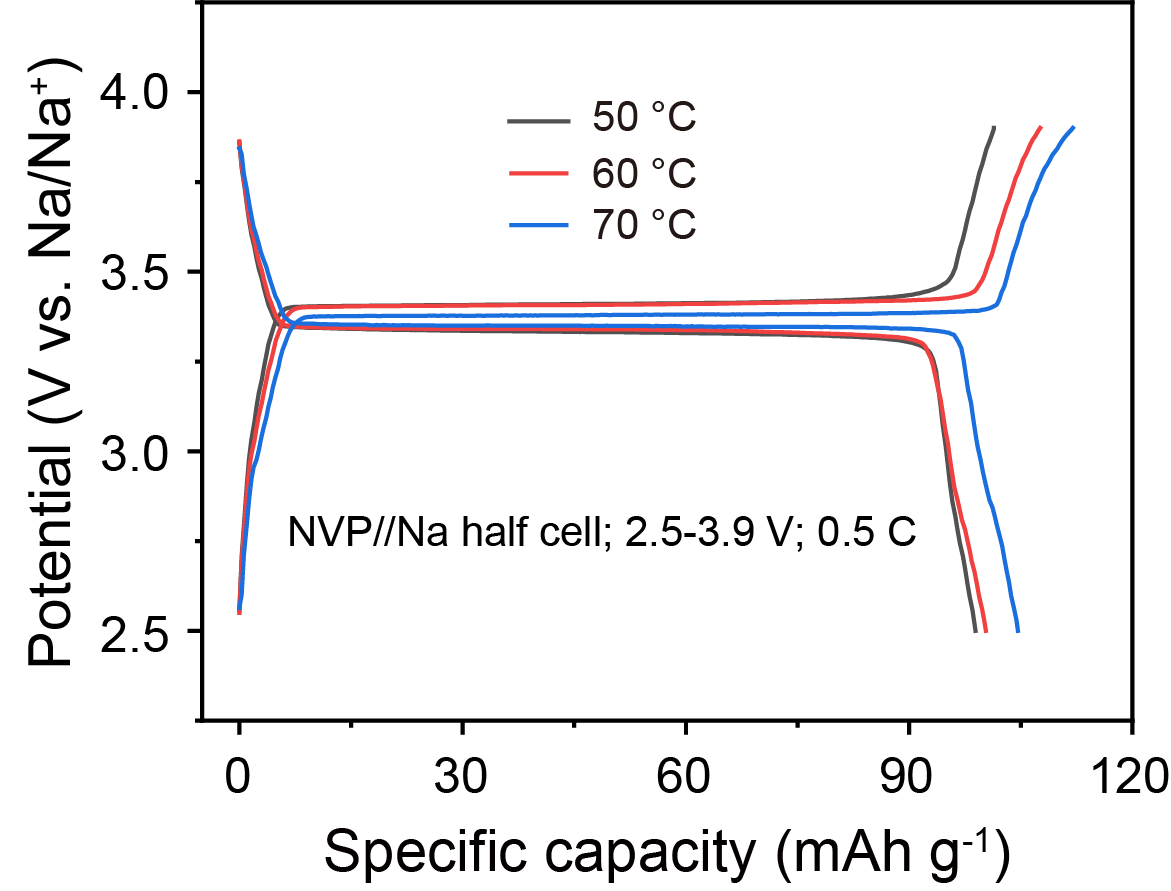


**Supplementary Figure 11.** Typical GCD curves of the NVP cathode in NDPP electrolyte at high temperatures.


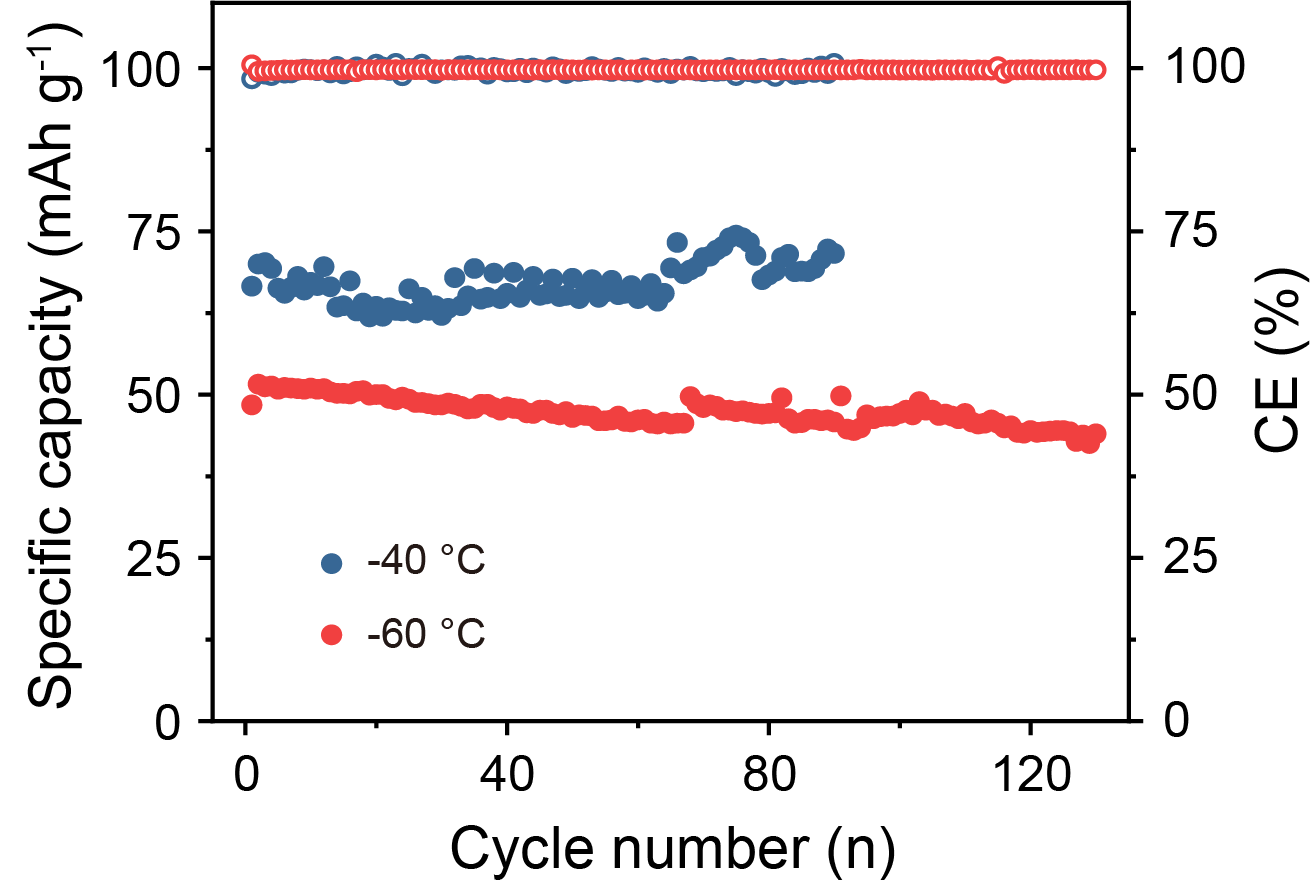


**Supplementary Figure 12.** Cycling stability of the NVP cathode in NDPP electrolyte at 0.1 C and low temperatures.


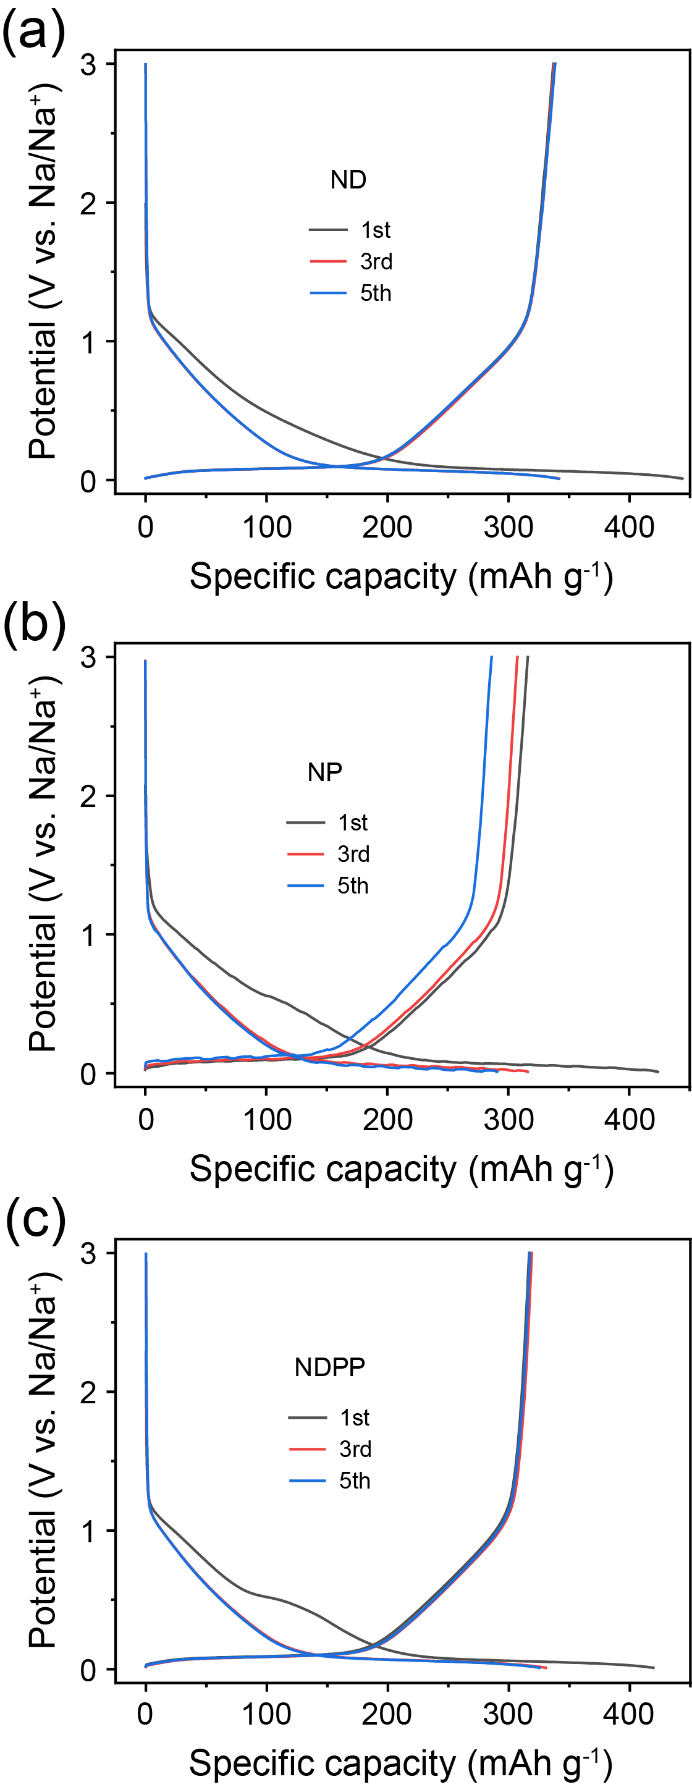


**Supplementary Figure 13.** GCD curves of the HC//Na half cells at 25 mA g-1 with different electrolytes. (a) ND, (b) NP and (c) NDPP.


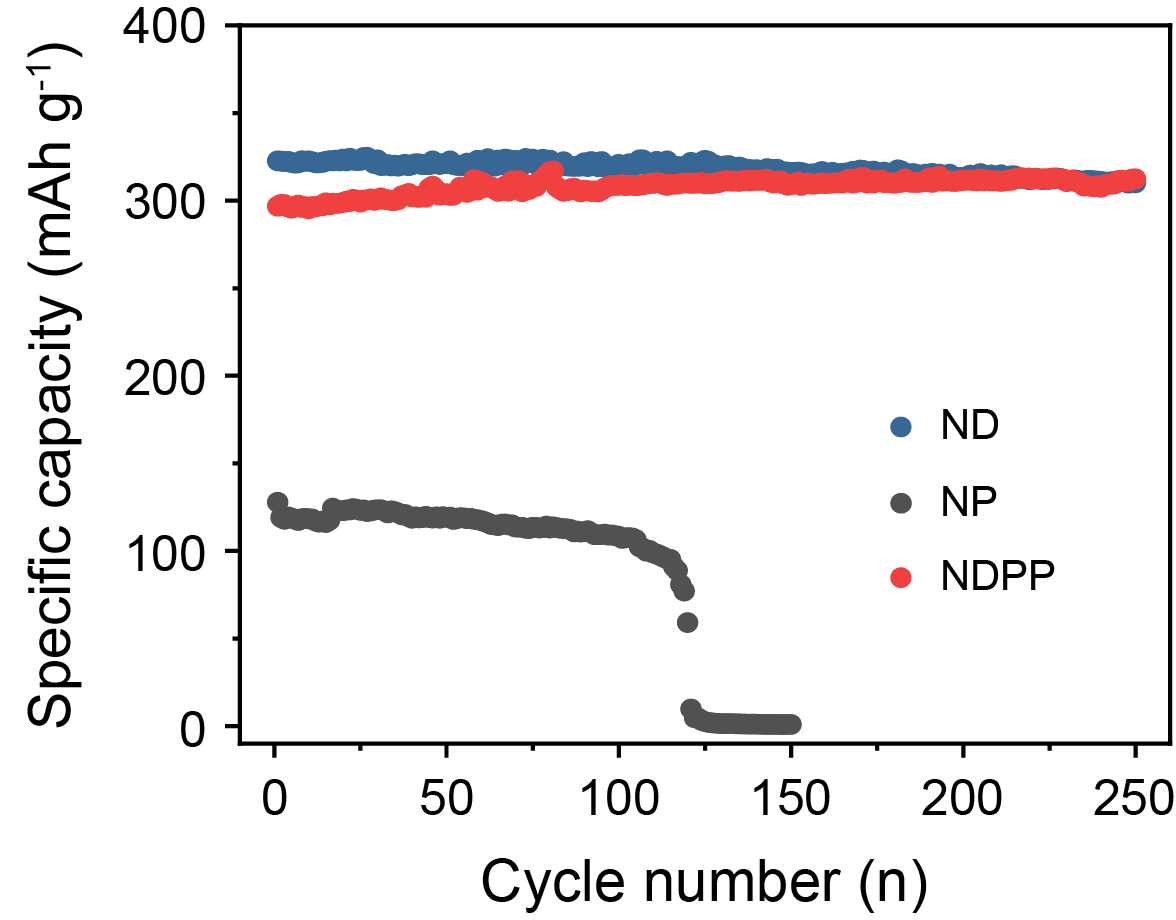


**Supplementary Figure 14.** Electrochemical stability of the HC//Na half cells with different electrolytes at 100 mA g-1.


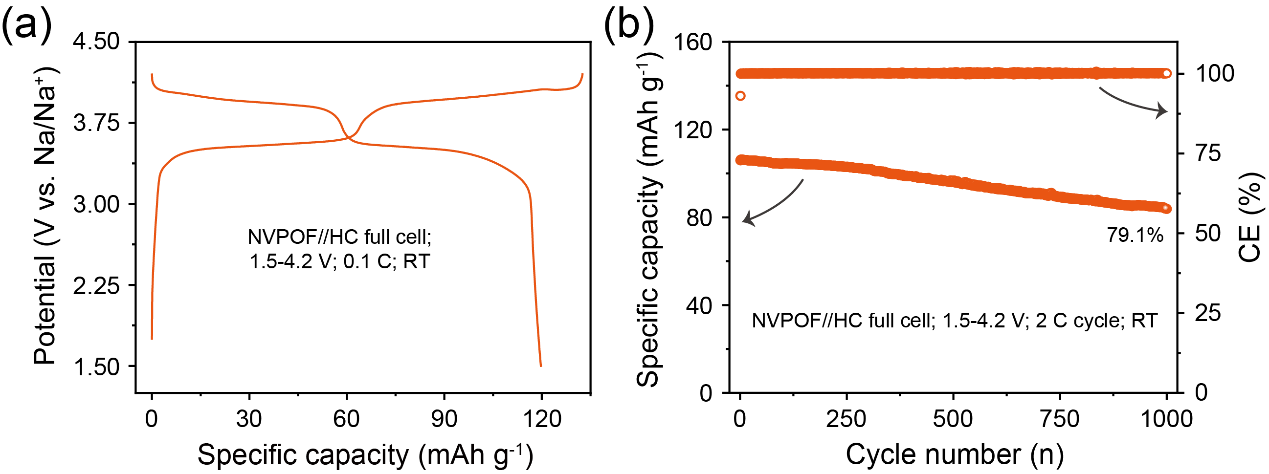


**Supplementary Figure 15.** Electrochemical evaluation of NVPOF//HC full cells with the NDPP electrolyte. (a) The initial GCD profile. (b) Cycling performance.


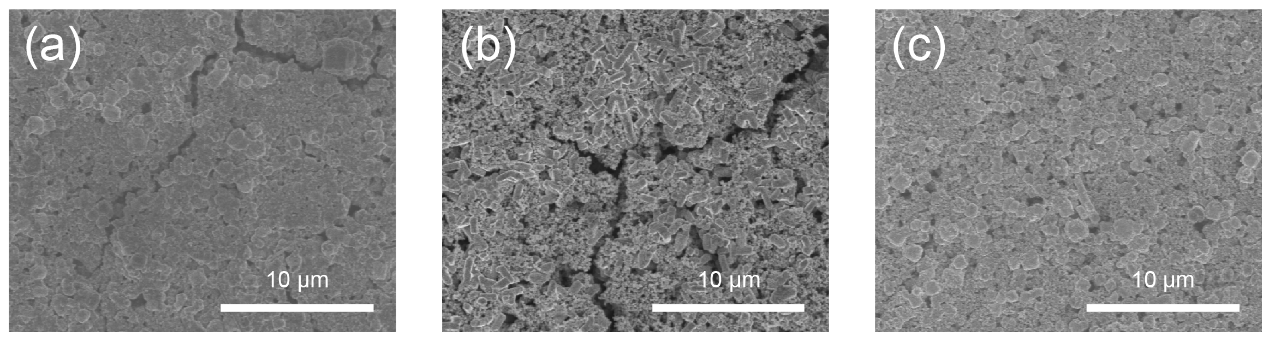


**Supplementary Figure 16.** SEM images for the cycled NVPOF cathodes at RT in (a) ND, (b) NP and (c) NDPP electrolytes, respectively.


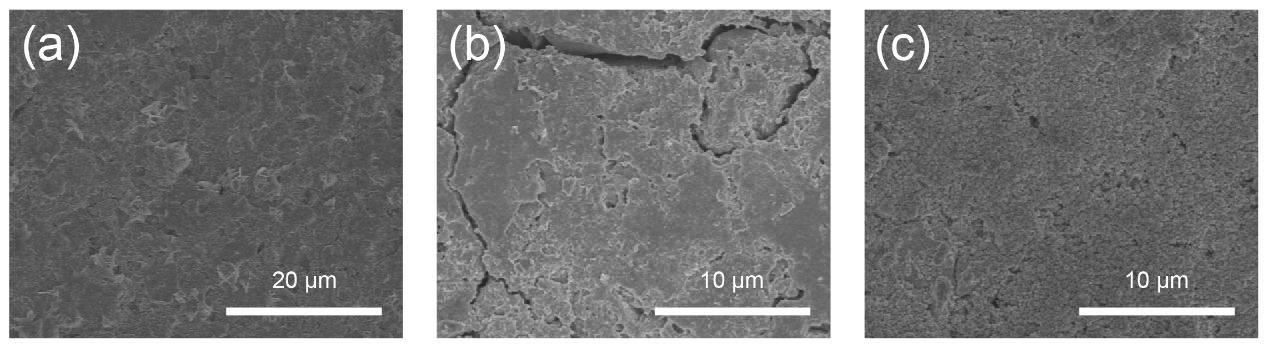


**Supplementary Figure 17.** SEM images of the cycled HC anodes at RT in (a) ND, (b) NP and (c) NDPP electrolytes, respectively.


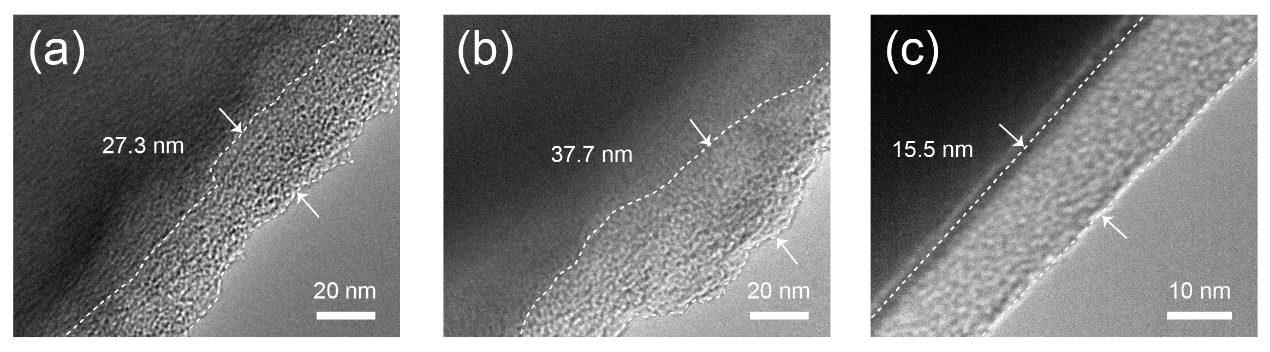


**Supplementary Figure 18.** TEM images for the cycled HC anodes at RT in (a) NDPP, (b) NP and (c) ND electrolytes, respectively.


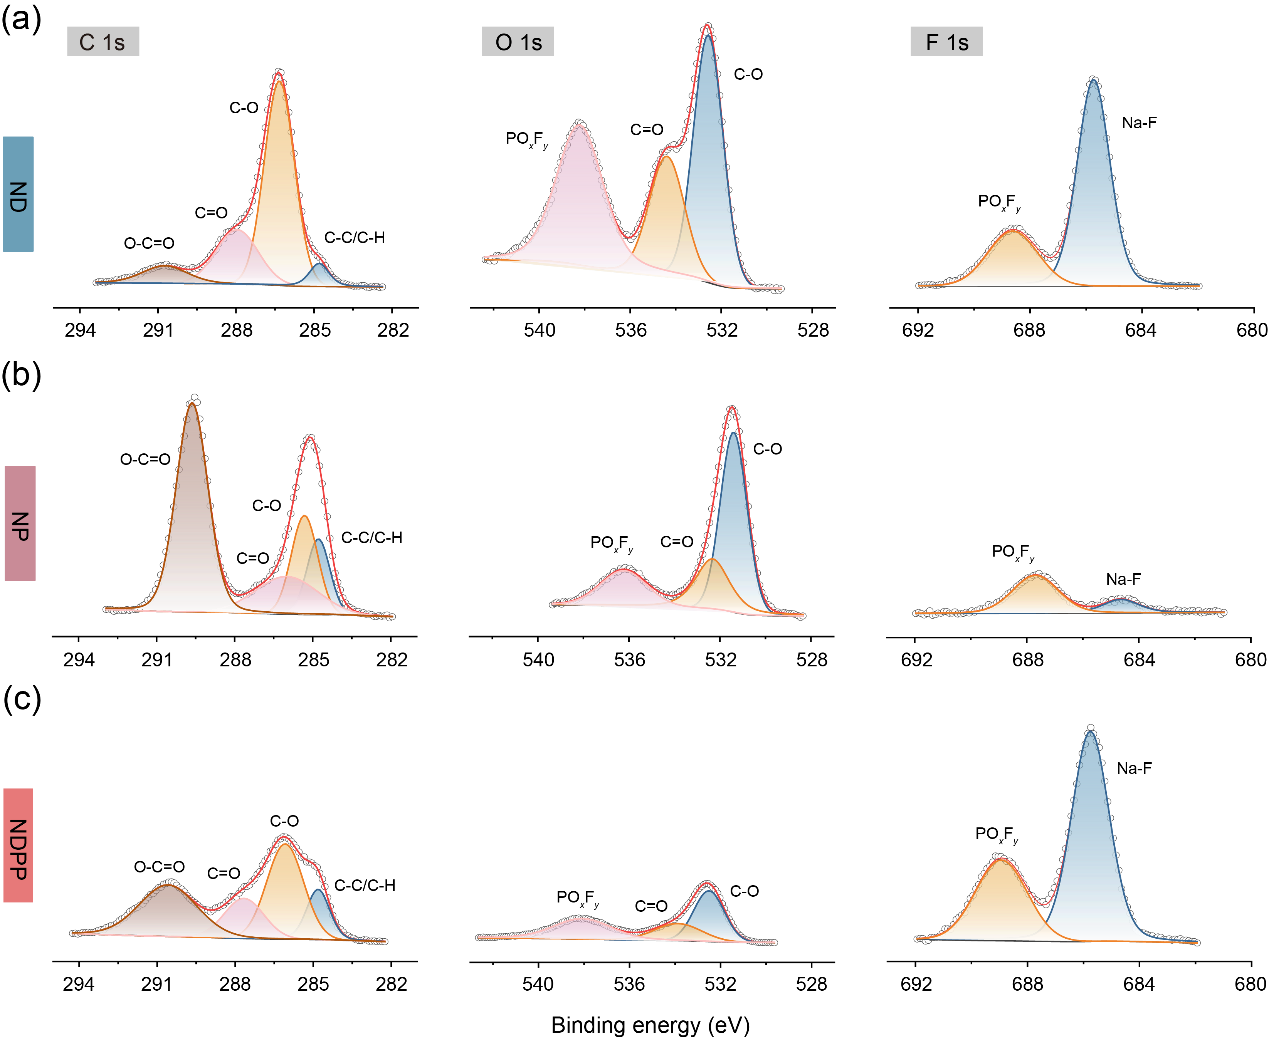


**Supplementary Figure 19.** XPS spectra for C1s, O1s and F1s for the cycled HC anodes in (a) ND, (b) NP and (c) NDPP electrolytes, respectively.


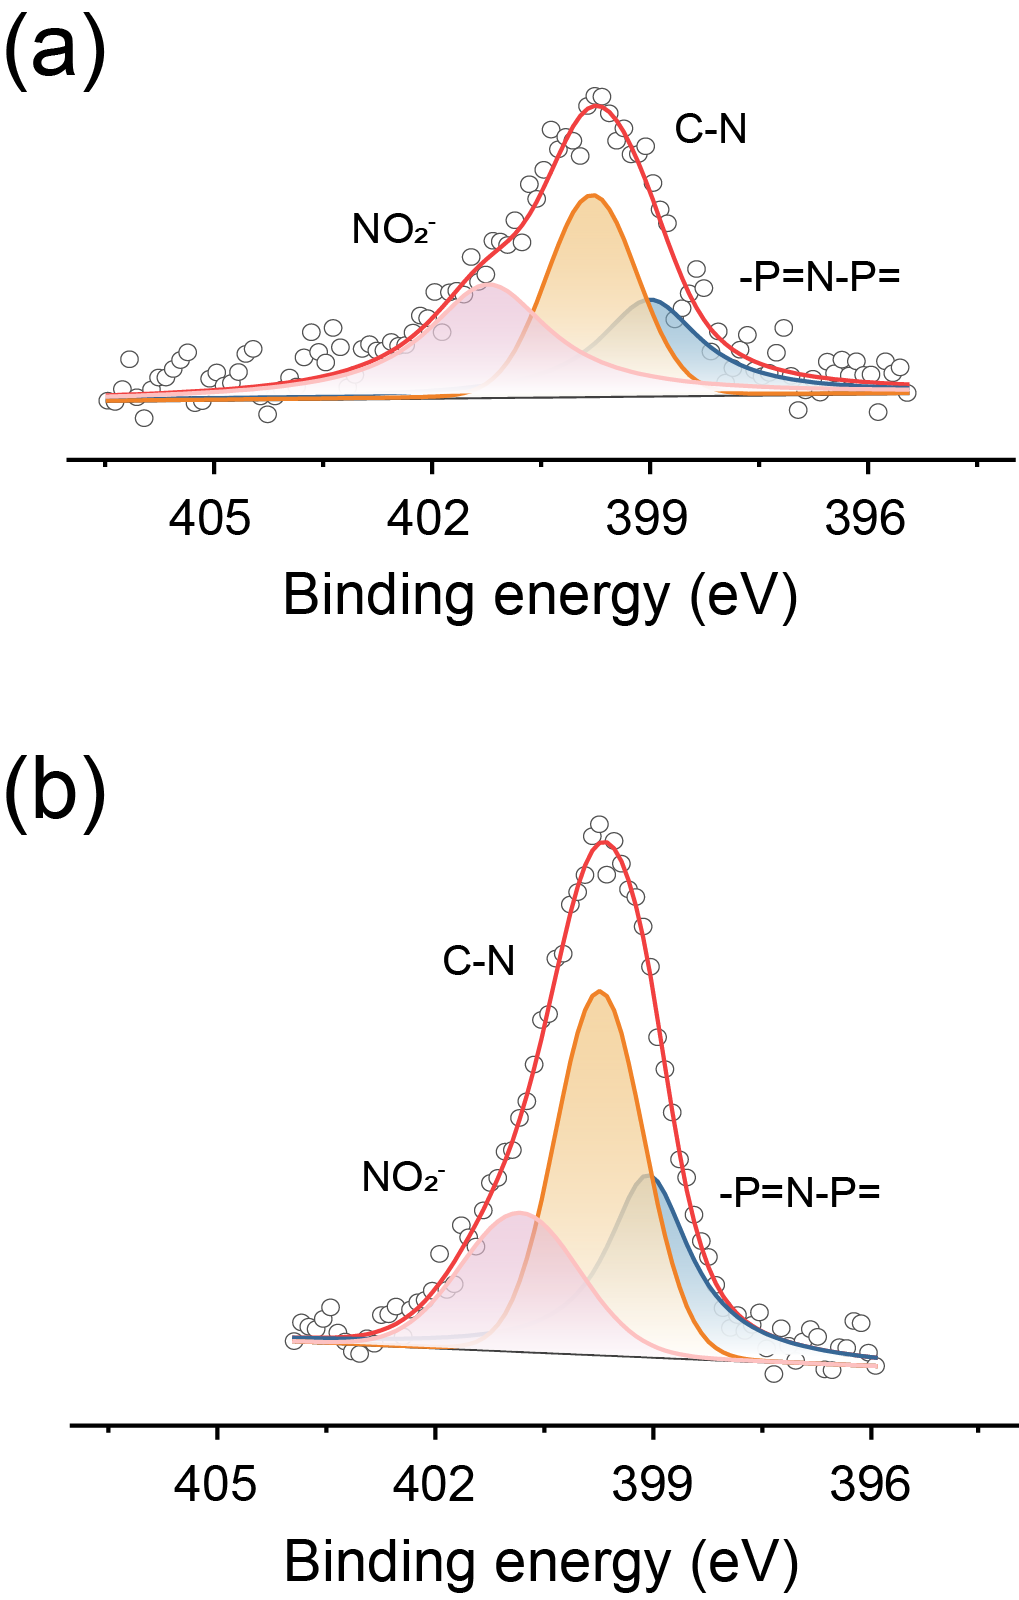


**Supplementary Figure 20.** XPS spectra for N1s for the cycled (a) NVPOF cathode and (b) HC anode in NDPP, respectively.


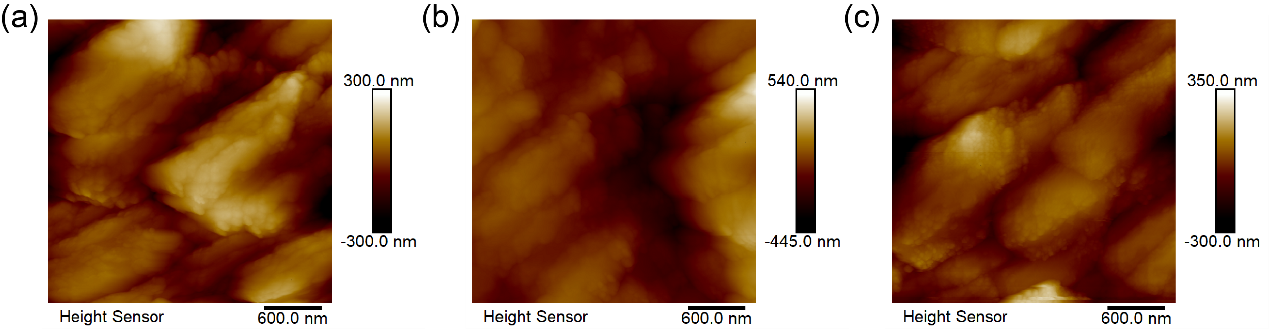


**Supplementary Figure 21.** 2 D AFM images for the cycled NVPOF cathodes in (a) ND, (b) NP and (c) NDPP electrolytes, respectively.

**Supplementary Table 1:** Abbreviations of different solvents.

| Name | Abbreviations |
| --- | --- |
| Ethylene carbonate | EC |
| Propylene carbonate | PC |
| Dimethyl carbonate | DMC |
| Diethyl carbonate | DEC |
| Ethyl methyl carbonate | EMC |
| 1,2-Dimethoxyethane | DME |
| Diethylene glycol dimethyl ether | G2 |
| Ethylene glycol diethyl ether | DEE |
| Tetrahydrofuran | THF |
| 2-Methyltetrahydrofuran | MeTHF |
| Tetrahydropyran | THP |
| Ethoxy (pentafluoro)cyclotriphosphazene | PFPN |

**Supplementary Table 2:** A series of basic physicochemical properties of various solvents.

| Solvent | Melting point (*T*m) [℃] | Boiling point (*T*b) [℃] | Flash point (*T*f) [℃] | Viscosity (*η*) at 25 ℃ [cP] | Dielectric constant (*ε*) at 25 ℃ | DN value |
| --- | --- | --- | --- | --- | --- | --- |
| EC | 36.4 | 248 | 160 | 1.9 | 89.78 | 16.4 |
| PC | -48.8 | 242 | 132 | 2.53 | 64.9 | 15.1 |
| DMC | 4.6 | 91 | 18 | 0.59 | 3.11 | 16 |
| DEC | -74.3 | 126 | 31 | 0.75 | 2.81 | 16 |
| EMC | -53 | 110 | 23 | 0.65 | 2.4 | 17.2 |
| DME | -58 | 82.5 | 0 | 0.45 | 7.18 | 20 |
| G2 | -64 | 162 | 57 | 1.88 | 7.23 | 19.5 |
| DEE | -74 | 121 | 27 | - | 3.9 | - |
| THF | -108.5 | 66 | -14 | 0.46 | 7.58 | 20 |
| MeTHF | -137.2 | 78 | -11 | 0.47 | 6.97 | 18 |
| THP | -45.2 | 87.9 | -15.6 | 0.764 | 5.61 | 22 |

**Supplementary Table 3:** Names and formulae of the studied electrolyte systems.

| Name | Composition |
| --- | --- |
| ND | 0.8 M NaPF6 in DEE |
| NP | 0.8 M NaPF6 in PC |
| NDP | 0.8 M NaPF6 in DEE-PC (1: 1 by volume ratio) |
| NDPP | 0.8 M NaPF6 in DEE-PC-PFPN (5: 5: 2 by volume ratio) |

**Video S1.** Flame test of the ND electrolyte.

**Video S2.** Flame test of the NP electrolyte.

**Video S3.** Flame test of the NDPP electrolyte.
